# Supplementary material for: Aerogel-inspired interfacial engineering of metal–organic framework and black phosphorus heterojunction for enhanced CO 2 photocatalytic reduction
Source: Royal Society of Chemistry journal article supplement (doi:10.1039/d5cc06050h), 2025-11-27
Supplement: d5cc06050h1.pdf [file d5cc06050h1.pdf]

1 Supplemental Information for

2

3 Aerogel-Inspired Interfacial Engineering of Metal-Organic Framework and Black  
4 Phosphorus Heterojunction for Enhanced CO<sub>2</sub> Photocatalytic Reduction

5

6 *Zunbin Duan<sup>a,†</sup>, Jenaidullah Batur<sup>b,†</sup>, Huiming Zhang<sup>c</sup>, Yanfang Li<sup>a</sup>, Rui Li<sup>b,\*</sup>, and Guanglei Zhang<sup>a,\*</sup>*

7

8 <sup>a</sup> National Engineering Research Center for Colloidal Materials and School of Chemistry and  
9 Chemical Engineering, Shandong University, Jinan 250100, China

10 <sup>b</sup> Beijing Key Laboratory for Green Catalysis and Separation, College of Materials Science and  
11 Engineering, Beijing University of Technology, Beijing 100124, China

12 <sup>c</sup> College of Chemical Engineering and Materials, Shandong University of Aeronautics, Binzhou  
13 256603, China

14

15 \* Corresponding authors: [lirui1@bjut.edu.cn](mailto:lirui1@bjut.edu.cn) (R. Li) and [zhanggl@sdu.edu.cn](mailto:zhanggl@sdu.edu.cn) (G. Zhang)

16 <sup>†</sup> Both authors contributed equally to this work

17

## 18    **SECTION S1. Experimental Procedures**

### 19    ***S1.1 Materials***

20        Black phosphorus (BP; 99.999%) crystal was purchased from Hubei Xingfa Chemicals Group  
21    Co., Ltd.    *N, N*-dimethylformamide (DMF; 99.9%), tetrabutylammonium bromide (99.5%),  
22    zirconium tetrachloride (ZrCl<sub>4</sub>; 99%), 2-aminoterephthalic acid, and acetic acid were purchased from  
23    Shanghai Aladdin Biochemical Technology Co., Ltd.    All chemical reagents were used as received  
24    without further purification.

### 25    ***S1.2 Synthesis of black phosphorus and metal organic framework heterojunctions***

26        *Synthesis of black phosphorus (BP) nanosheets by electrochemical exfoliation.*<sup>1</sup>    The bulk BP  
27    crystals (cathode) and platinum foil (anode) were meticulously positioned in parallel separated by a  
28    distance of 5 cm, and immersed in DMF containing 40 g L<sup>-1</sup> of tetrabutylammonium bromide.    The  
29    exfoliation process was conducted under constant current conditions of 30 mA for a duration of 30  
30    min.    The product was collected, centrifuged four times with acetone to get rid of the remaining  
31    solvent, and concentrated, yielding a suspension with a concentration of 15 mg mL<sup>-1</sup>.

32        *Synthesis of metal-organic framework (MOF) by solvothermal strategy.*<sup>2</sup>    Typically, 15.0 g  
33    (64.4 mmol) of ZrCl<sub>4</sub>, 11.7 g (64.4 mmol) of 2-aminoterephthalic acid and 440 mL (7.73 mol) of  
34    acetic acid were dissolved in 1 L of DMF.    Then, 75 mL of H<sub>2</sub>O was added.    The resulting  
35    homogeneous solution was heated at 120 °C for 15 min under stirring before it was cooled to RT.  
36    The product of Zr-based MOF (NH<sub>2</sub>-UiO-66) was separated *via* centrifugation at 10,000 rpm for 3  
37    min and purified with ethanol several times.

38        *Synthesis of MOF and BP heterojunction (MOF-BP) by mechanochemical ball milling.*<sup>1, 3, 4</sup>

39 The synthesis of MOF-BP was conducted in a 50 mL agate jar, to which 27 g of agate balls, 2 mL of  
40 ethanol, and 350 mg of MOF and BP with a mass ratio of 2:1 were added. The ball-milling  
41 procedure was performed at 200 rpm for a total of 12 h, using a cyclic rotation pattern consisting of  
42 30 min forward rotation, 30 min reverse rotation, and a 2 min pause, resulting in an overall time of  
43 766 min. Subsequent to milling process, the resulting material was collected and dried under  
44 vacuum at 60 °C. The MOF-BP powder was subsequently stored in a sealed tube within a nitrogen-  
45 filled glovebox to prevent exposure to oxygen and oxidation.

### 46 ***S1.3 CO<sub>2</sub> photocatalytic reduction*<sup>5</sup>**

47 Typically, 1 mg of photocatalyst, 20 µL of H<sub>2</sub>O, and 20 µL of triethanolamine were added a  
48 120 mL of quartz reactor without the employment of any photosensitizers. Irradiated by a xenon  
49 lamp (300 W; >400 nm), the gaseous products were evaluated every 2 h using a gas chromatograph  
50 (Agilent 7890B) with a thermal conductivity detector and helium as the carrier gas.

### 51 ***S1.4 Materials characterization***

52 Scanning electron microscopy (SEM) was and energy dispersive X-ray spectroscopy (EDS)  
53 were carried out on a Zeiss Supra 55 Sapphire field-emission scanning electron microscope) at 2.0  
54 kV and a distance of 5.0 mm. Powder X-ray diffraction (XRD) was performed on a Rigaku  
55 SmartLab diffractometer by using Cu K $\alpha$  radiation (40 kV, 30 mA). X-ray photoelectron  
56 spectroscopy (XPS) was carried out on a Thermo Fisher ESCALab 250Xi spectrometer with Al K $\alpha$   
57 radiation, and the obtained spectra were calibrated based on the C 1s peak at 284.6 eV. The  
58 Brunauer-Emmett-Teller measurements were recorded with a Micromeritics ASAP 2020 surface area  
59 and porosimetry analyzer. The diffuse reflectance spectra were acquired on the Perkin-Elmer

60 lambda 950 UV/Vis/NIR spectrophotometer at a scanning rate of 600 nm min<sup>-1</sup> and data interval of  
61 1.00 nm. The atomic force microscopy samples were prepared by spin-coating or drop-casting an  
62 aliquot of the diluted sample-ethanol suspension on Si. The femtosecond transient absorption  
63 spectroscopy was measured by a specialized spectrometer comprised of a regenerative-amplified Ti  
64 laser system (Coherent) and a Helios pump-probe system (Ultrafast Systems). *In-situ* diffuse  
65 reflectance Fourier transform infrared spectroscopy was carried out on a Fourier transform infrared  
66 spectrometer equipped with a mercury cadmium telluride detector.

### 67 ***S1.5 Photoelectrochemical measurements***

68 Electrochemical impedance spectroscopy (EIS) and Mott-Schottky analysis were conducted  
69 utilizing a Zahner Zennium electrochemical workstation to characterize the electrochemical  
70 properties of the photocatalyst. 2 mg of photocatalyst was dispersed in a mixed solvent comprising  
71 1 mL of methanol and 10 µL of Nafion. Subsequent to ultrasonic dispersion, 100 µL of this  
72 suspension was deposited onto a fluorine-doped tin oxide glass substrate, thereby preparing the  
73 working electrode. The three-electrode configuration was adopted, including a Pt plate serving as  
74 the counter electrode, a Ag/AgCl electrode acting as the reference electrode, and a 0.5 M Na<sub>2</sub>SO<sub>4</sub>  
75 solution as the electrolyte. Temporal photo-response measurements were carried out at 0.5 V.  
76 Electrochemical impedance spectroscopy was measured without light irradiation at open circuit  
77 potential. Photocurrent measurements were executed on a CHI760E electrochemical workstation,  
78 employing a 300 W xenon lamp equipped with a UV cutoff filter ( $\lambda > 400$  nm) as the light source.  
79 The photocurrent response of the sample was recorded at the open circuit potential over a duration of  
80 1,000 s to ascertain the photoelectrochemical performance. Mott-Schottky plots with frequencies  
81 of 500, 1,000, and 1,500 Hz were gathered in the voltage range of -0.8–1.0 V. All the measured

82 voltages were converted with respect to the normal hydrogen electrode (NHE) using the Nernst  
83 equation as follows:

$$84 \quad E_{NHE} = E_{Ag/AgCl} + 0.2046 \quad (1)$$

85 where  $E_{NHE}$  was the converted potential vs. NHE,  $E_{Ag/AgCl}$  was the measured potential vs. the reference  
86 electrode of Ag/AgCl, and pH was kept at 7.0 at 25 °C.

87 The solar-to-chemical conversion (SCC) efficiency was obtained according to Eq. S2,

$$88 \quad \text{SCC efficiency (\%)} = \frac{[\Delta G^{\circ} \text{ for CO formation (J mol}^{-1})] \times [\text{CO formed (mol)}]}{[\text{Total input energy (W)}] \times [\text{Reaction time (s)}]} \times 100\% \quad (2)$$

89 where the free energy for CO formation is 137.2 kJ mol<sup>-1</sup>; the light intensity is 1472 mW cm<sup>-2</sup>, and  
90 the irradiation area is 1.59 × 10<sup>-1</sup> cm<sup>2</sup>, thus the total input energy is 0.234 W.

91

93

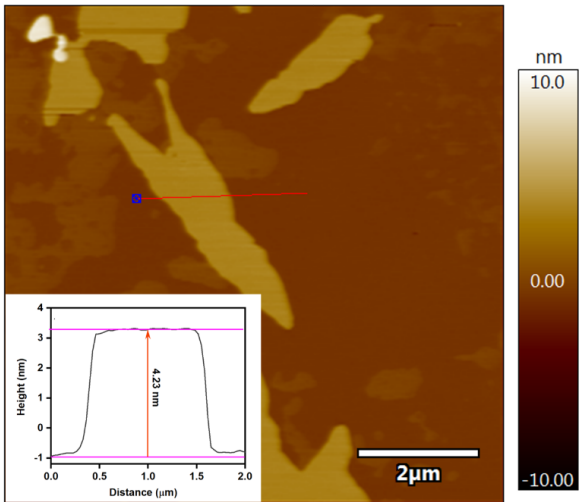

94

95    **Figure S1.**    AFM image of BP sheets with an insert of measured height profile.

96

97

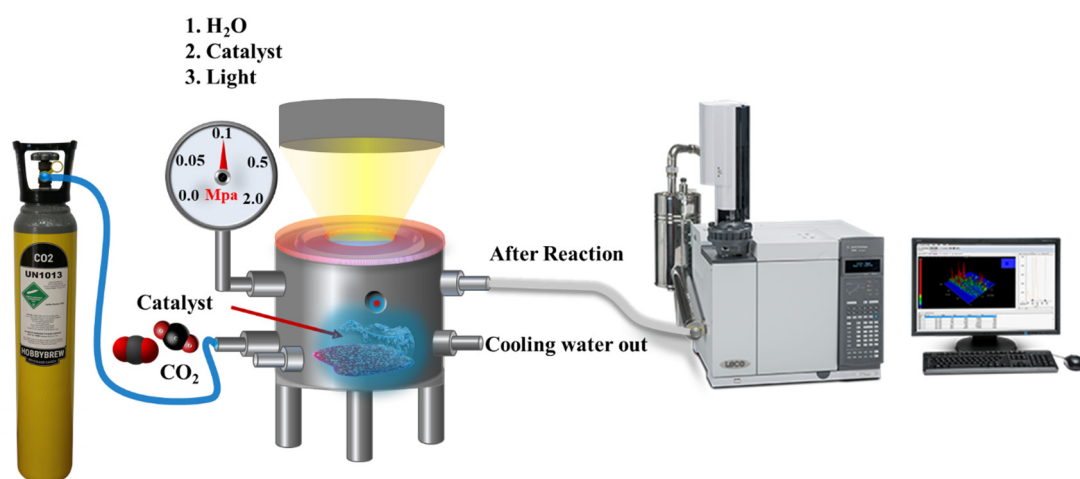

98

99 **Figure S2.** Scheme of photocatalytic process using MOF-BP catalyst.

100

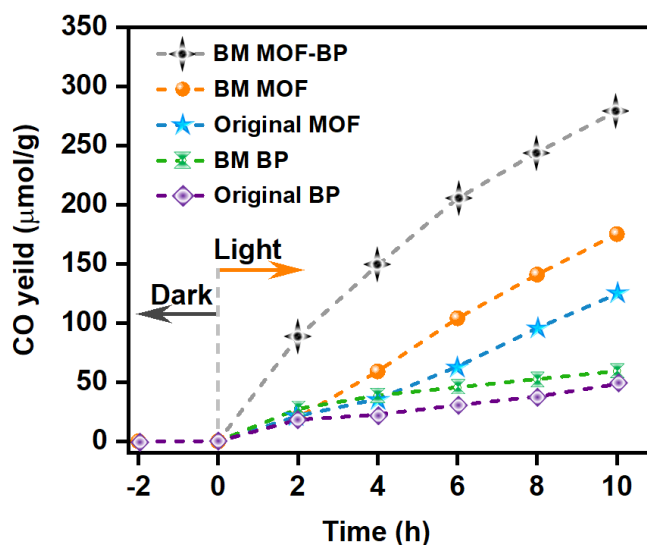

**Figure S3. Impacts of wet ball milling treatment on the photocatalytic CO<sub>2</sub>RR performance.**

Without ball milling (BM), the performances of NH<sub>2</sub>-UiO-66 and BP are notably more inferior, exhibiting CO generation rates of only 13.3 and 3.8 μmol g<sup>-1</sup> h<sup>-1</sup>, respectively. The pristine NH<sub>2</sub>-UiO-66 possesses inherent photocatalytic activity, owing to its amine groups and coordinatively unsaturated Zr<sup>4+</sup> sites (defects), which contribute both CO<sub>2</sub> adsorption capacity and baseline CO<sub>2</sub>RR activity. This explains why pristine MOF exhibits higher activity than pristine BP. In the composite system, however, the functional roles are optimized through synergistic division of labor: MOF primarily acts to adsorb and enrich CO<sub>2</sub> while supplying photogenerated electrons; BP, with its high electrical conductivity and favorable band position, efficiently accepts electrons and performs the CO<sub>2</sub>-to-CO reduction step. Thus, the heterojunction overcomes the intrinsic limitations of each component (poor charge separation in MOF and weak CO<sub>2</sub> affinity in BP) and achieves much higher overall activity than either material alone. Without ball milling, the composite cannot be effectively formed and would simply correspond to a physical mixture of the two precursors.



117

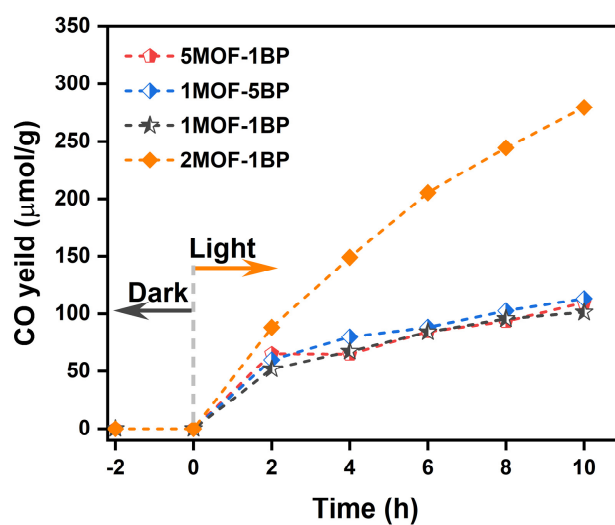

118

119 **Figure S4. Photocatalytic properties of heterojunctions composed of different MOF and BP**

120 **ratios.** The heterojunctions with a mass ratio of MOF to BP of 1:5, 1:1, 2:1, and 5:1 are labeled as

121 1MOF-5BP, 1MOF-1BP, 2MOF-1BP, and 5MOF-1BP, respectively. The 2MOF-1BP demonstrates

122 the optimal CO yield among the four examined photocatalysts. A specific description is not

123 provided; the acronym MOF-BP is an abbreviation for 2MOF-1BP.

124

125

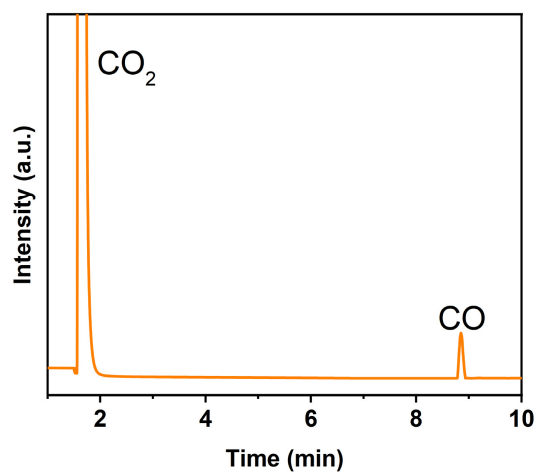

126

127 **Figure S5. Representative gas chromatogram of product.** Besides the distinct peaks  
128 correspond to CO<sub>2</sub> and CO, no detectable signals for H<sub>2</sub>, other C1 (*e.g.*, CH<sub>4</sub>, HCOOH), or C2  
129 hydrocarbons (*e.g.*, C<sub>2</sub>H<sub>4</sub>, C<sub>2</sub>H<sub>6</sub>) are observed. The photocatalytic reaction for the MOF-BP  
130 proceeds through a highly selective single-carbon pathway, yielding CO as the exclusive gaseous  
131 product with a selectivity approaching 100%.

132

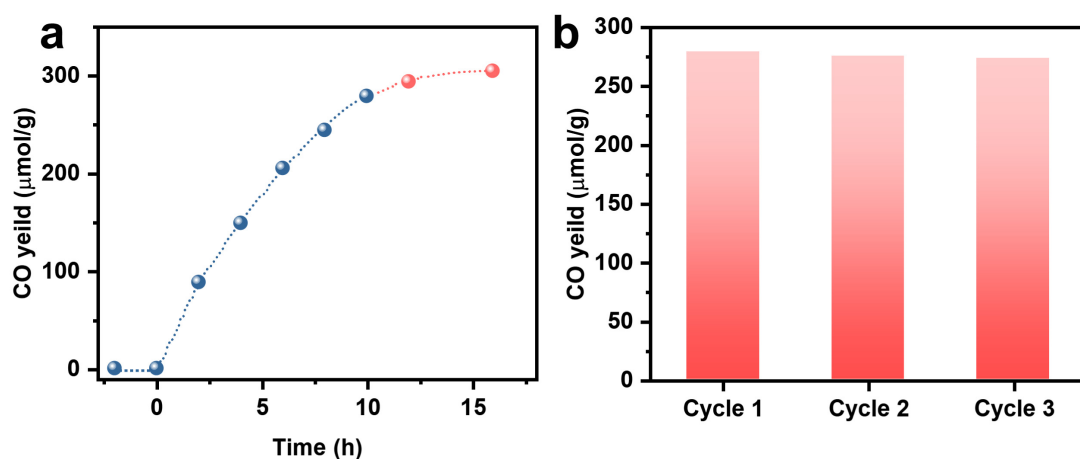

134

135 **Figure S6. (a) Long-term stability and (b) reusability of MOF-BP.** The reaction rate slows at  
136 extended irradiation times due to the depletion of available reactants in the closed reaction system  
137 (Figure S6a). After replenishing the substrate, the catalyst maintains its activity without noticeable  
138 decay, and its photocatalytic performance remains essentially unchanged over three consecutive  
139 reaction cycles (Figure S6b). Thus, the MOF-BP heterojunction possesses outstanding long-term  
140 stability and reusability for CO<sub>2</sub> photoreduction.

141

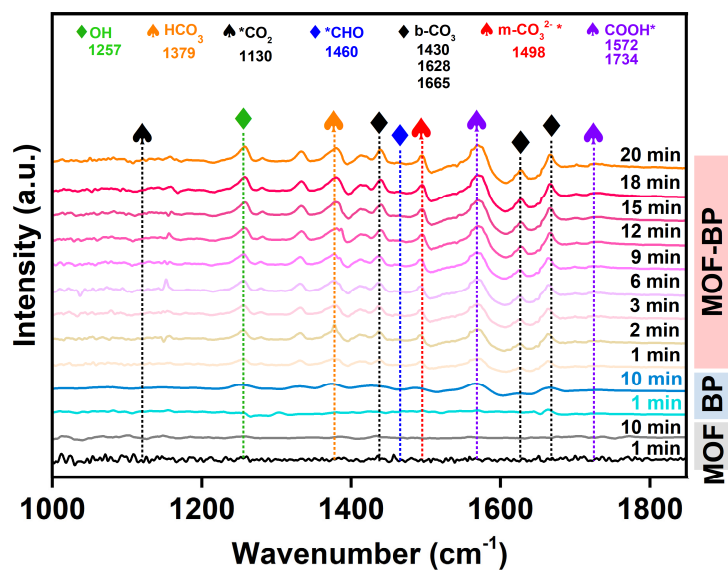

143

144 **Figure S7. *In-situ* DRIFTS spectra of MOF, BP, and MOF-BP.** The *in-situ* DRIFTS reveals  
145 radically improved signals for the designed MOF-BP, whereas the corresponding spectra of both  
146 components basically show no noticeable peaks. For MOF-BP, adsorbed \*CO<sub>2</sub> and various  
147 carbonates including m-CO<sub>3</sub><sup>2-</sup>, b-CO<sub>3</sub><sup>2-</sup>, and HCO<sub>3</sub><sup>-</sup> are identified, and pivotal C1 intermediates  
148 (COOH\* and \*CHO) are concurrently observed, confirming its single-carbon reduction pathway for  
149 facilitating CO<sub>2</sub>RR.

150

151 **SECTION S3. Supplemental tables**

152

153 **Table S1.** Comparisons of MOF-BP and reported catalysts for CO<sub>2</sub> photocatalytic reduction.

| Photocatalyst                        | Reaction condition                                                                                                                                                                             | Product<br>( $\mu\text{mol g}^{-1} \text{h}^{-1}$ ) | Ref.                                                            |
|--------------------------------------|------------------------------------------------------------------------------------------------------------------------------------------------------------------------------------------------|-----------------------------------------------------|-----------------------------------------------------------------|
| MOF-BP                               | 20 L H <sub>2</sub> O and TEOA, 300 W Xe lamp ( $\lambda > 400 \text{ nm}$ ), 10% CO <sub>2</sub>                                                                                              | CO: 30.7                                            | This work                                                       |
| MAF-34-CoRu                          | CH <sub>3</sub> CN/H <sub>2</sub> O (5 mL), 300 W Xe lamp ( $\lambda > 400 \text{ nm}$ ), 15% CO <sub>2</sub>                                                                                  | CO: 4.26<br>CH <sub>4</sub> : 0.20                  | <i>J. Am. Chem. Soc.</i> <b>2022</b> , 144, 8676                |
| RP-MIL101                            | 20 L H <sub>2</sub> O and TEOA, 300 W Xe lamp ( $\lambda > 400 \text{ nm}$ ), 10% CO <sub>2</sub> /N <sub>2</sub>                                                                              | CO: 7.80<br>C <sub>2</sub> H <sub>6</sub> : 3.81    | <i>Appl. Catal. B-Environ. Energy</i> <b>2025</b> , 378, 125568 |
| MgCo <sub>2</sub> O <sub>4</sub>     | 7.5 mg [Ru(bpy) <sub>3</sub> ]Cl <sub>2</sub> ·6H <sub>2</sub> O (bpy=2'2-bipyridine), 2 mL water, 3 mL acetonitrile and 1mL triethanolamine, 10% CO <sub>2</sub> , 5 W LED light (400–800 nm) | CO: 58                                              | <i>App. Catal. B-Environ.</i> <b>2020</b> , 260, 118208         |
| In-MOF@TP-TA                         | 2 mL H <sub>2</sub> O, 300 W Xe lamp                                                                                                                                                           | CO: 25.0<br>CH <sub>4</sub> : 11.67                 | <i>Chem. Eng. J.</i> <b>2022</b> , 446, 137011                  |
| Ni@6MOF/BVO                          | 5 mL H <sub>2</sub> O, 300 W Xe lamp                                                                                                                                                           | CO: 44.5                                            | <i>Adv. Mater.</i> <b>2022</b> , 34, e2205303                   |
| In <sub>2</sub> O <sub>3</sub> /BiOI | 100 mL H <sub>2</sub> O, 10 mL TEOA, 300 W Xe lamp                                                                                                                                             | CO: 11.9                                            | <i>J. CO<sub>2</sub> Util.</i> <b>2022</b> , 65, 102220         |

154

155    **SECTION S4.    Supplemental references**

- 156    1.    Z. Duan, Y. Wang, S. Bian, D. Liu, Y. Zhang, X. Zhang, R. He, J. Wang, G. Qu, P. K. Chu and  
157    X. Yu, *Nanoscale*, 2022, **14**, 2599-2604.
- 158    2.    T. He, X. Xu, B. Ni, H. Wang, Y. Long, W. Hu and X. Wang, *Nanoscale*, 2017, **9**, 19209-19215.
- 159    3.    Z. Huo, Z. Duan, X. Feng, H. Wang, H. Huang, X. Fan, R. He, X. F. Yu and J. Wang, *Small*,  
160    2024, **20**, e2402483.
- 161    4.    Z. Duan, Q. Tong, X. Feng, H. Wang, Y. Yang, J. Wang, D. Liu, H. Bian, R. Li and Y. Yang,  
162    *Inorg. Chem.*, 2025, **64**, 14759-14766.
- 163    5.    Y. Wang, X. Zhang, Y. Sun, K. Chen, H. Zhao, Q. Lin, R. Li and J. Li, *Appl. Catal. B-Environ.*  
164    *Energy*, 2025, **378**, 125568.
- 165
